# Supplementary material for: A new class of laser dyes, 2-oxa-bicyclo[3.3.0]octa-4,8-diene-3,6-diones, with unity fluorescence yield
Source: Royal Society of Chemistry journal article supplement (doi:10.1039/b604539a), 2006-01-01
Supplement: b604539a.pdf [file b604539a.pdf]

# Supplementary Material (ESI) for Chemical Communications  
# This journal is (c) The Royal Society of Chemistry 2006

**Synthesis, Characterization and Photophysical Properties of  
2-Oxa-bicyclo[3.3.0]octa-4,8-diene-3,6-diones: A New Series of Potential Laser  
Dyes**

*Supporting Information*

*Chao-Yu Wang, Yu-Shan Yeh, Elise Y. Li, Yi-Hong Liu, Shiu-Ming Peng, Shiu-Tzung  
Liu\*, Pi-Tai Chou\**

*Department of Chemistry and Instrumentation Center, National Taiwan University,  
Taipei 106, Taiwan*

**Experimental**

*General information* Toluene was distilled under N<sub>2</sub> from sodium benzophenone ketyl. Tungsten carbene complex **2** was prepared according to the previously reported method [1]. Chemicals were purchased from commercial sources and used without further purification. Nuclear magnetic resonance spectra were recorded in CDCl<sub>3</sub> on either a Bruker AM-300 or AVANCE 400 spectrometer. Chemical shifts are given in parts per million relative to Me<sub>4</sub>Si for <sup>1</sup>H and <sup>13</sup>C NMR. Infrared spectra were measured on a Nicolet Magna-IR 550 spectrometer (Series-II) as KBr pellets.

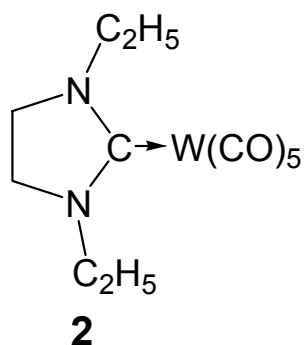

*Preparation of Compound 1a-1c* To an autoclave(100 mL) was loaded with phenylacetylene and rhodium complex (or other metal complexes) in dry toluene. The

reactor was flashed with nitrogen several times. Carbon monoxide was then pressurized and the resulting mixture was stirred at 110°C. After that, solvents were evaporated and the residue was chromatographed on silica gel. The crude product was recrystallized from diethyl ether to give **1a-1c** as red-purple solids.

The NMR and infrared data were reported below.

**1a:** <sup>1</sup>H NMR (CDCl<sub>3</sub>, 400 MHz): δ 8.54-8.51 (m, 2H), 7.77-7.75 (m, 2H), 7.50-7.39 (m, 6H), 3.69 (s, 2H). <sup>13</sup>C NMR (CDCl<sub>3</sub>, 100 MHz): δ 191.3 (C=O), 170.2 (COO), 150.7, 142.8, 130.9, 130.6, 130.1, 129.9, 128.9, 128.8, 128.6, 128.5, 122.0, 119.1, 44.4 (CH<sub>2</sub>). IR (KBr): (ν<sub>C=O</sub>) 1752(s), 1746(s) cm<sup>-1</sup>.

**1b:** <sup>1</sup>H NMR (CDCl<sub>3</sub>, 400 MHz): δ 8.54 (d, 2H, *J*=9.2Hz), 7.70 (d, 2H, *J*=9.2Hz), 6.98 (d, 4H, *J*=9.2Hz), 3.87 (s, 6H, *OMe*), 3.64 (s, 2H, *CH*<sub>2</sub>). <sup>13</sup>C NMR (CDCl<sub>3</sub>, 100MHz): 191.7 (C=O), 170.8 (COO), 161.1, 160.6, 140.6, 130.8, 130.2, 123.7, 122.4, 120.4, 117.9, 114.5, 114.0, 55.7 (OCH<sub>3</sub>), 55.6 (OCH<sub>3</sub>), 44.6 (CH<sub>2</sub>). IR (KBr): (ν<sub>C=O</sub>) 1767(s), 1746(s) cm<sup>-1</sup>.

**1c:** <sup>1</sup>H NMR (CDCl<sub>3</sub>, 400 MHz): δ 8.50 (d, 2H, *J*=8.8Hz), 7.68 (d, 2H, *J*=8.8Hz), 7.46-7.43 (m, 4H), 3.68 (s, 2H, *CH*<sub>2</sub>). <sup>13</sup>C NMR (CDCl<sub>3</sub>, 100MHz): 191.4 (C=O), 174.8 (COO), 137.5, 136.7, 130.5, 130.0, 129.5, 129.1, 128.2, 127.7, 121.3, 118.5, 44.1(CH<sub>2</sub>). IR (KBr): (ν<sub>C=O</sub>) 1752(s), 1732(s) cm<sup>-1</sup>.

**Crystallography.** Crystal suitable for X-ray diffraction analysis was afforded from slow evaporation of the chloroform solution of **1a** at room temperature. Cell parameters were determined either by a Siemens SMART CCD diffractometer. Crystal data for **1a**: C<sub>19</sub>H<sub>12</sub>O<sub>3</sub>, Fw = 288.29, Orthorhombic, Pca2<sub>1</sub>, *a* = 11.7937(4) Å, *b* = 12.9224(5) Å, *c* = 18.4121(6) Å, α = 90°, β = 90°, γ = 90°, *V* = 2806.1(2), *Z* = 8, *d*<sub>(calcd)</sub> = 1.365 Mg/m<sup>3</sup>, *F*(0,0,0) = 1200, 0.20 x 0.15 x 0.10 mm, θ range from 2.21° to 25.01°.

# Supplementary Material (ESI) for Chemical Communications

# This journal is (c) The Royal Society of Chemistry 2006

2533 reflections with  $R_{\text{int}}=0.1298$  out of 12826 total reflections. Full-matrix least-squares on  $F^2$  was used for refinement.  $R_1=0.0692$ ,  $wR_2=0.1411$  for  $[I>2\sigma(I)]$ .

Tables of atomic coordinates, thermal parameters and bond distances as well as bond angles are deposited in the supporting information. CCDC reference numbers 602233.

For crystallographic data in CIF or other electronic format see DOI: 10.1039/b604539a.

***Steady state and optical gain measurements*** Steady-state absorption and emission spectra were recorded with a Hitachi (U-3310) spectrophotometer and an Edinburgh (FS920) fluorimeter, respectively. DCM with an emission yield of  $\sim 0.44$  ( $\lambda_{\text{em}} \sim 630$  nm) in MeOH served as the standard to calculate the emission quantum yield. Nanosecond lifetime studies were performed with an Edinburgh FL 900 photon-counting system. The emission decays were analyzed by the sum of exponential functions, which allows partial removal of the instrument time broadening and consequently renders a temporal resolution of  $\sim 200$  ps. Optical gain measurements were carried out using the variable stripe length method [2]. In this method, the second harmonic of a  $Q$ -switched Nd:YAG pumped Ti:Sapphire laser (443 nm, pulse width 8 ns) was focused into a stripe on the quartz cell by a cylindrical lens. The stripe length was adjusted by a barrier coated with opaque materials. The stripe was aligned near the edge of the square quartz cell, and the emission was collected from the edge at a  $90^\circ$  angle with respect to the excitation beam. The emission was analyzed using a monochromator coupled to a gated ICCD detector.

***Theoretical Approach.*** Time-dependent DFT (TDDFT)[3] calculations using the B3LYP [4] functional were performed based on the structures optimized using the same method with 6-31+G(d) basis. The lowest 10 singlet roots of the nonhermitian eigenvalue equations were obtained to determine the vertical excitation energies. Oscillator strengths were deduced from the dipole transition matrix elements. The

# Supplementary Material (ESI) for Chemical Communications  
# This journal is (c) The Royal Society of Chemistry 2006

excited-state TDDFT calculations were carried out using Gaussian03 as described in our previous publications [5].

**Table S1.** Selected bond distances(Å), bond angles(deg) and dihedral angles(deg) of **1a**.<sup>a</sup> See Figure S7 for the numerical assignment.

|                         |           |                         |          |
|-------------------------|-----------|-------------------------|----------|
| C(1)-C(2)               | 1.49(1)   | C(2)-C(3)               | 1.370(9) |
| C(3)-C(4)               | 1.485(9)  | C(4)-C(5)               | 1.515(9) |
| C(5)-C(6)               | 1.537(8)  | C(6)-C(7)               | 1.348(9) |
| C(7)-O(1)               | 1.385(8)  | O(1)-C(1)               | 1.400(8) |
| C(6)-C(8)               | 1.45(1)   | C(2)-C(14)              | 1.46(1)  |
| C(20)-C(21)             | 1.484(9)  | C(21)-C(22)             | 1.36(1)  |
| C(22)-C(23)             | 1.483(9)  | C(23)-C(24)             | 1.498(9) |
| C(24)-C(25)             | 1.514(8)  | C(25)-C(26)             | 1.333(9) |
| C(26)-O(4)              | 1.376(7)  | O(4)-C(20)              | 1.407(8) |
| C(25)-C(27)             | 1.45(1)   | C(21)-C(33)             | 1.46(1)  |
|                         |           |                         |          |
| O(1)-C(1)-O(2)          | 118.3(6)  | O(2)-C(1)-C(2)          | 132.2(6) |
| C(1)-C(2)-C(14)         | 123.8(6)  | C(2)-C(3)-C(4)          | 144.0(7) |
| C(3)-C(4)-O(3)          | 128.8(7)  | C(4)-C(5)-C(6)          | 106.1(5) |
| C(5)-C(6)-C(8)          | 123.9(5)  | C(6)-C(7)-O(1)          | 131.7(6) |
| O(4)-C(20)-O(5)         | 119.1(6)  | O(5)-C(20)-C(21)        | 131.8(6) |
| C(20)-C(21)-C(33)       | 123.8(6)  | C(21)-C(22)-C(23)       | 145.0(7) |
| C(22)-C(23)-O(6)        | 128.0(7)  | C(23)-C(24)-C(25)       | 105.3(5) |
| C(24)-C(25)-C(27)       | 123.4(5)  | C(25)-C(26)-O(4)        | 133.7(7) |
|                         |           |                         |          |
| C(6)-C(7)-C(3)-C(2)     | -179.5(6) | C(4)-C(3)-C(7)-O(1)     | 179.7(5) |
| C(3)-C(2)-C(14)-C(15)   | - 4(1)    | C(7)-C(6)-C(8)-C(9)     | 2(1)     |
| C(14)-C(2)-C(1)-O(2)    | - 2(1)    | O(3)-C(4)-C(3)-C(2)     | - 3(1)   |
| C(25)-C(26)-C(22)-C(21) | 179.3(6)  | C(23)-C(22)-C(26)-O(4)  | 179.0(6) |
| C(22)-C(21)-C(33)-C(34) | 169.4(7)  | C(26)-C(25)-C(27)-C(28) | 176.1(6) |
| C(33)-C(21)-C(20)-O(5)  | -1(1)     | O(6)-C(23)-C(22)-C(21)  | 3(1)     |

<sup>a</sup> This system is statistically in between centrosymmetric and non-centrosymmetric space group. The structure was solved under the non-centrosymmetric space group. Alternatively, we have made an attempt to solve the structure by using a centrosymmetric space group but unfortunately failed.

**Table S2.** The calculated energy levels of the lower-lying transitions of **1a**.

|                | Assignments         | [nm]  | E [eV] | <i>F</i> |
|----------------|---------------------|-------|--------|----------|
| S <sub>1</sub> | HOMO → LUMO(+72%)   | 472.6 | 2.62   | 0.7233   |
| S <sub>2</sub> | HOMO-4 → LUMO(+92%) | 405.6 | 3.06   | ~0       |
| S <sub>3</sub> | HOMO-1 → LUMO(+95%) | 388.6 | 3.19   | 0.0076   |
| S <sub>4</sub> | HOMO-2 → LUMO(+82%) | 353.3 | 3.51   | 0.0304   |
| S <sub>5</sub> | HOMO-3 → LUMO(+92%) | 348.9 | 3.55   | 0.0020   |

**Table S3.** The calculated energy levels of the lower-lying transitions of **1b**.

|                | Assignments                              | [nm]  | E [eV] | <i>F</i> |
|----------------|------------------------------------------|-------|--------|----------|
| S <sub>1</sub> | HOMO → LUMO(+72%)                        | 513.3 | 2.42   | 0.9109   |
| S <sub>2</sub> | HOMO-3 → LUMO(+92%)                      | 396.4 | 3.13   | ~0       |
| S <sub>3</sub> | HOMO-1 → LUMO(+84%)                      | 390.4 | 3.18   | 0.0111   |
| S <sub>4</sub> | HOMO-2 → LUMO(+95%)                      | 358.5 | 3.46   | 0.0002   |
| S <sub>5</sub> | HOMO-4 → LUMO(+88%)<br>HOMO → LUMO+2(5%) | 328.4 | 3.78   | ~0       |

**Table S3.** The calculated energy levels of the lower-lying transitions of **1c**.

|                | Assignments         | [nm]  | E [eV] | <i>F</i> |
|----------------|---------------------|-------|--------|----------|
| S <sub>1</sub> | HOMO → LUMO(+73%)   | 488.8 | 2.54   | 0.8903   |
| S <sub>2</sub> | HOMO-3 → LUMO(+92%) | 406.4 | 3.05   | ~0       |
| S <sub>3</sub> | HOMO-1 → LUMO(+84%) | 373.7 | 3.32   | 0.0117   |
| S <sub>4</sub> | HOMO-2 → LUMO(+93%) | 368.1 | 3.37   | 0.0093   |
| S <sub>5</sub> | HOMO-4 → LUMO(+93%) | 334.1 | 3.71   | 0.0037   |

**Figure S1.**  $^1\text{H-NMR}$  spectra of **1a**.

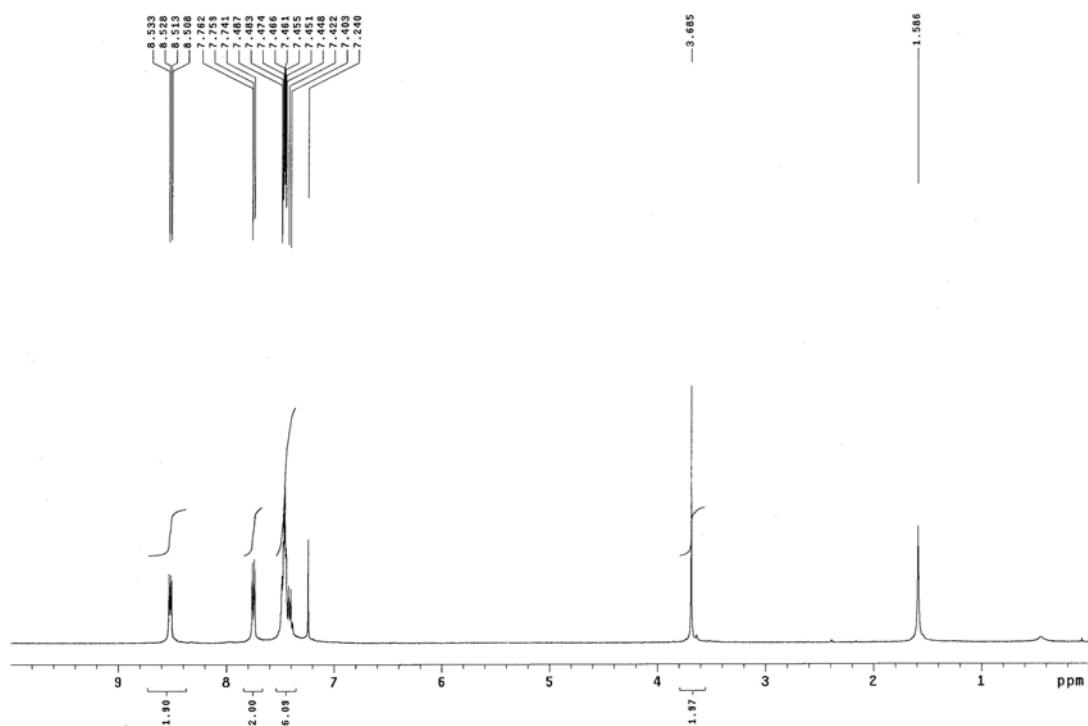

**Figure S2.**  $^1\text{H-NMR}$  spectra of **1b**.

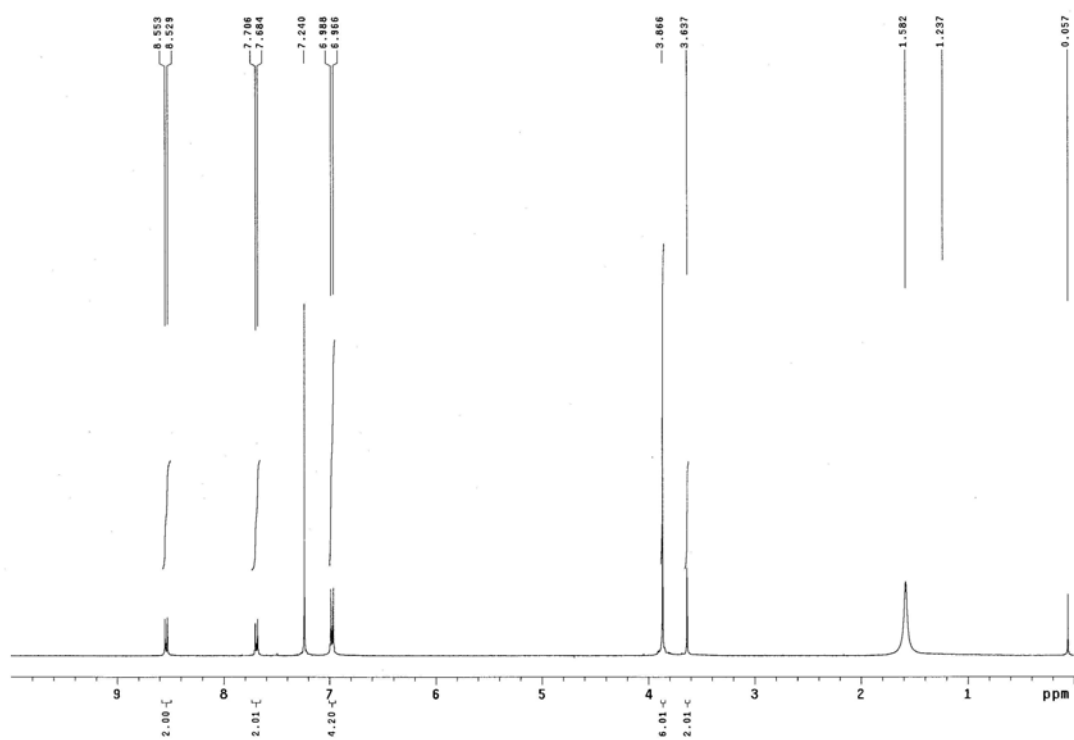

**Figure S3.**  $^1\text{H-NMR}$  spectra of **1c**.

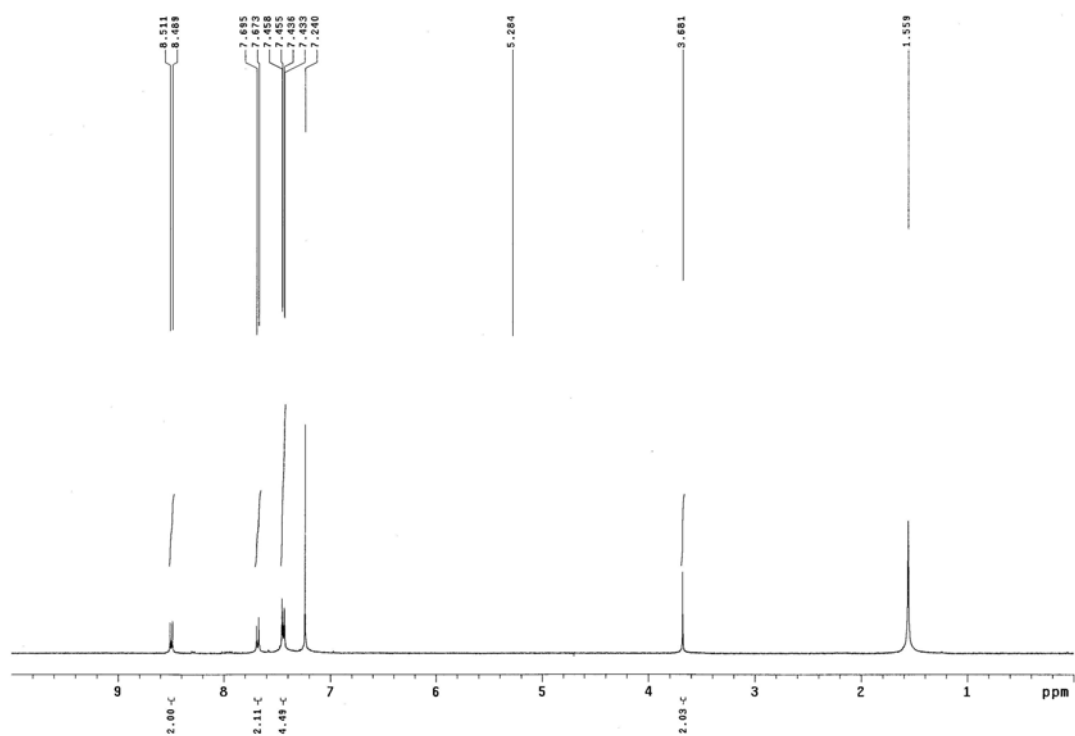

**Figure S4.** Selected frontier orbitals of **1a** involved in the lower lying transitions.

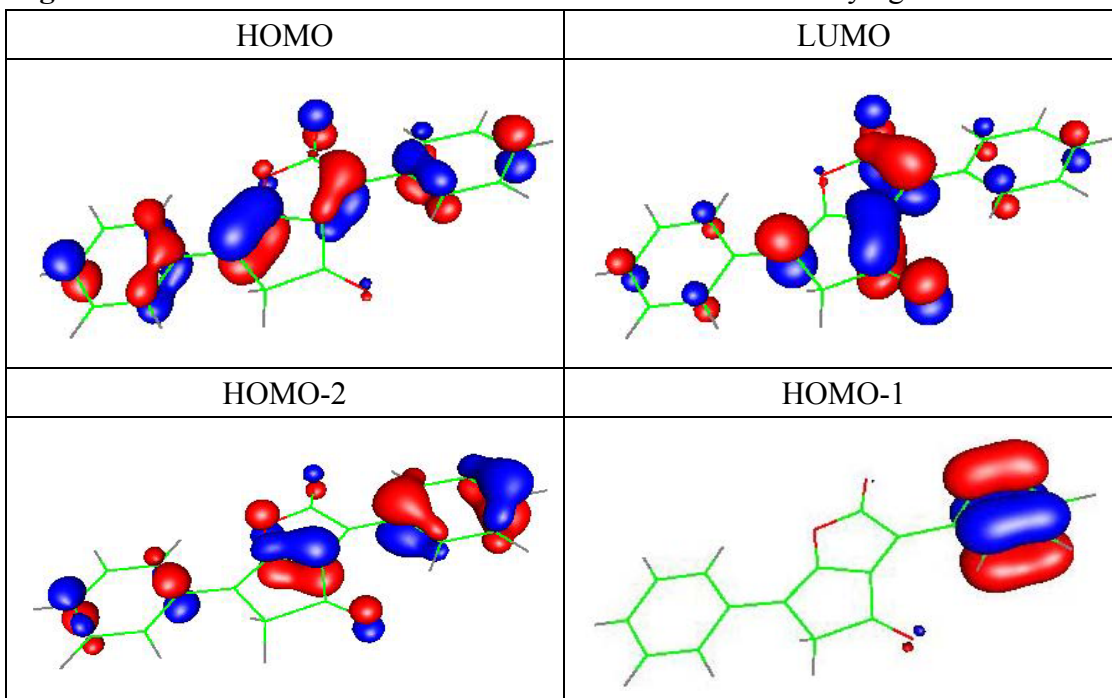



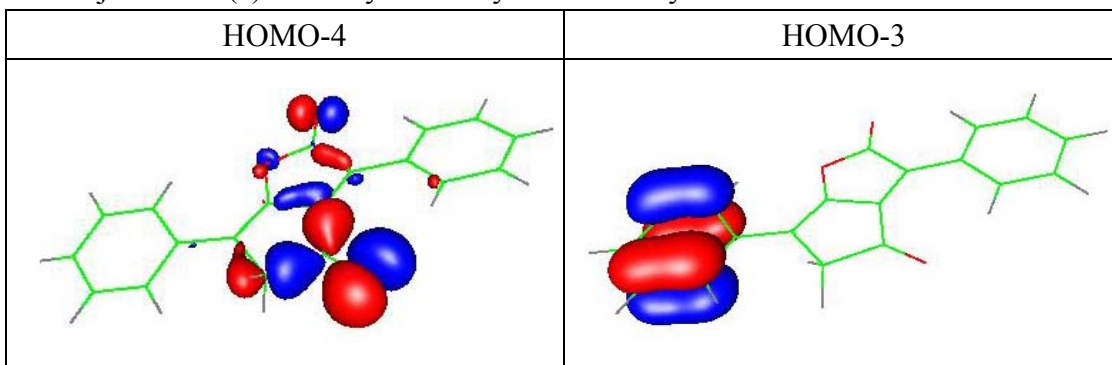

**Figure S5.** Selected frontier orbitals of **1b** involved in the lower lying transitions.

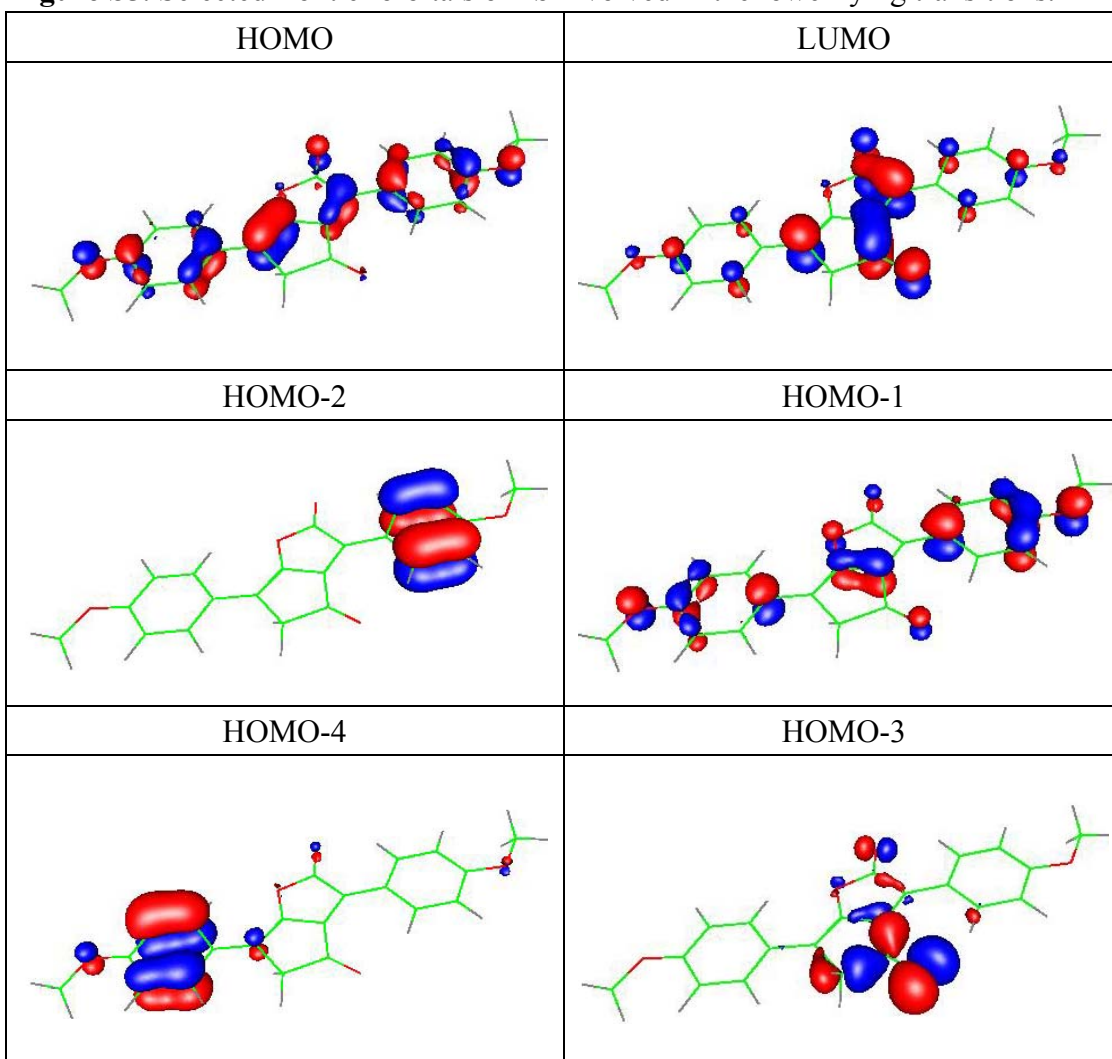

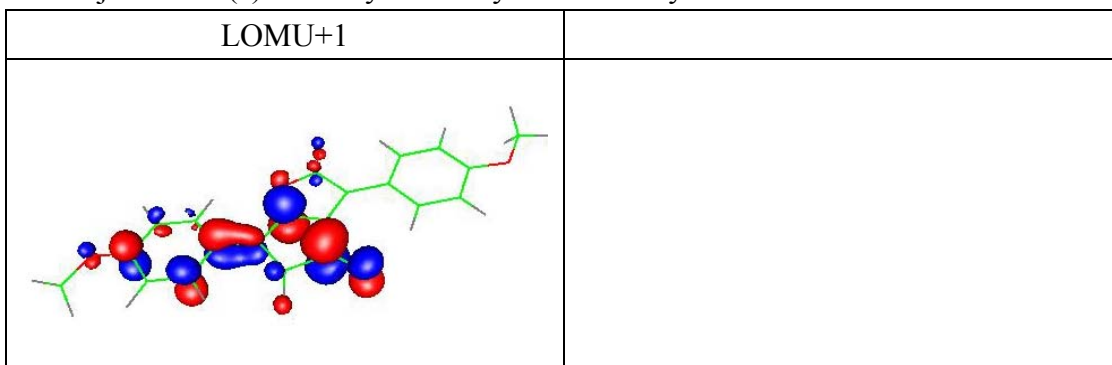

**Figure S6.** Selected frontier orbitals of **1c** involved in the lower lying transitions.

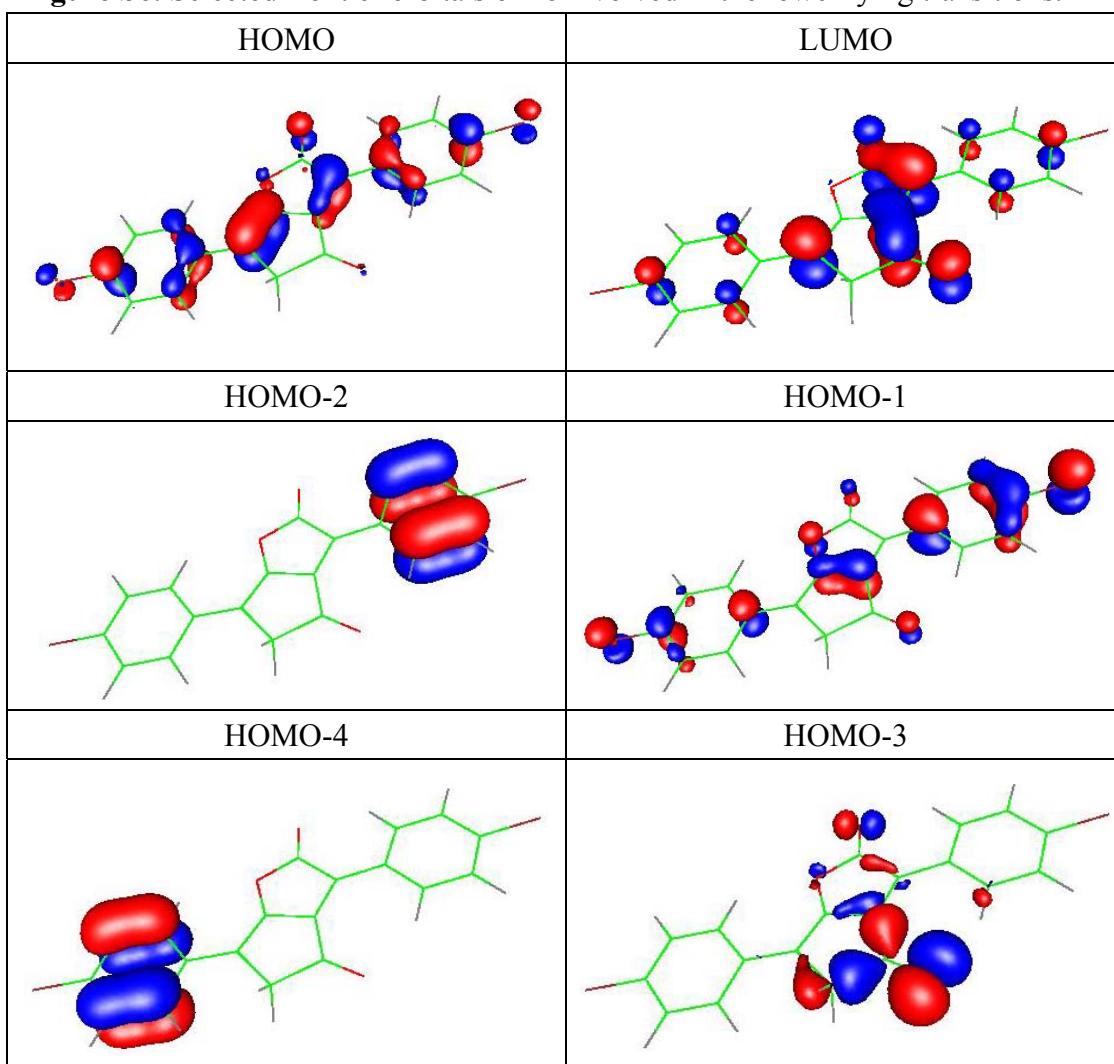

**Figure S7.** ORTEP Plot of **1a** (including two independent molecules) with ellipsoids drawn at the 30% probability level.

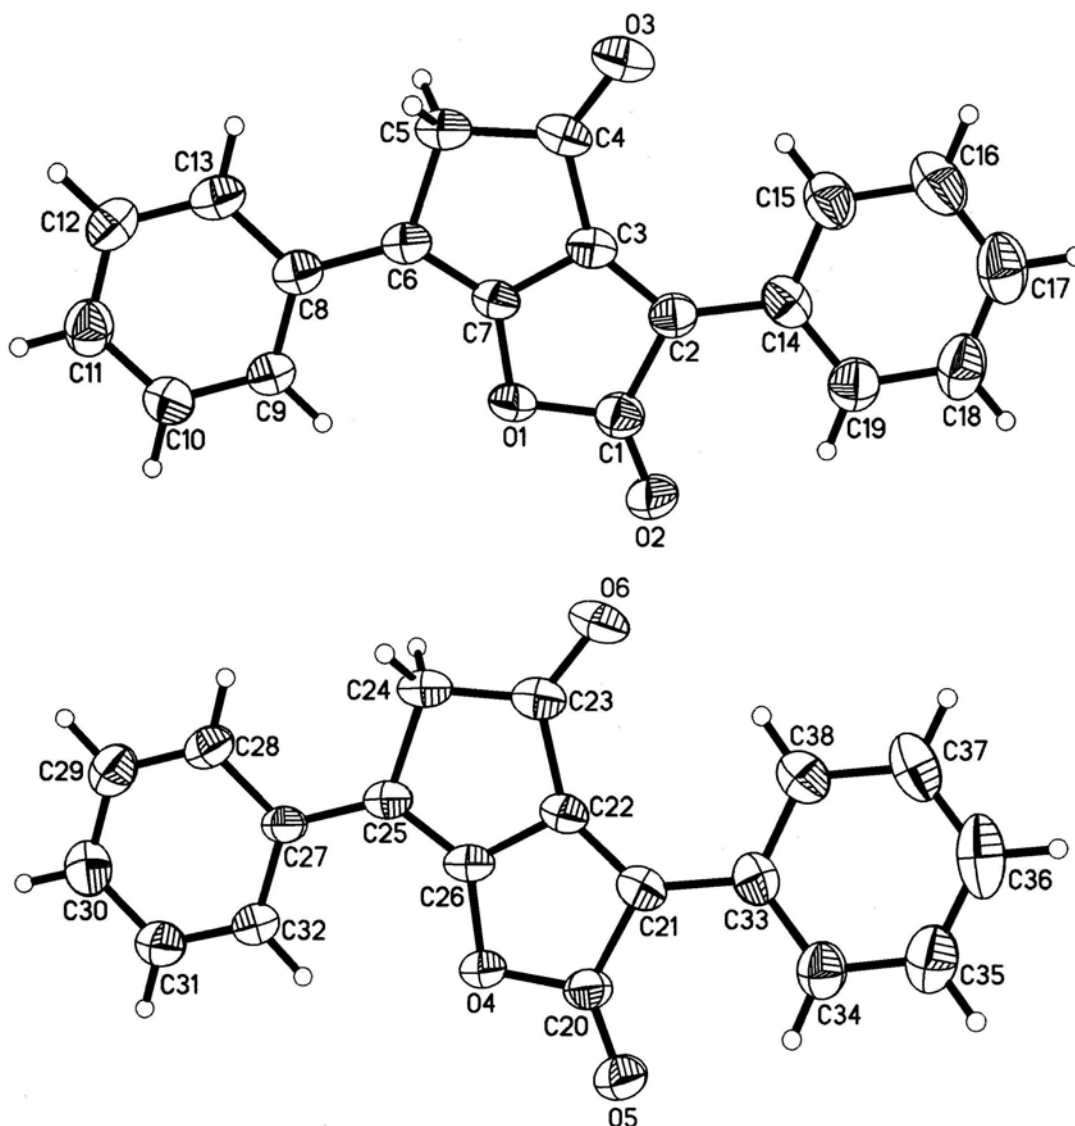

**References:**

1. C.-Y. Liu, D.-Y. Chen, G.-H. Lee, S.-M. Peng and S.-T. Liu *Organometallics*, 1996, **15**, 1055.
2. K. L. Shaklee, R. E. Nahory and R. F. Leheny, *J. Lumin.*, 1973, **7**, 284.
3. (a) C. Jamorski, M. E. Casida and D. R. Salahub, *J. Chem. Phys.*, 1996, **104**, 5134.  
(b) M. Petersilka, U. J. Grossmann and E. K. U. Gross, *Phys. Rev. Lett.*, 1996, **76**, 1212.  
(c) R. Bauernschmitt, R. Ahlrichs, F. H. Hennrich and M. M. Kappes, *J. Am. Chem. Soc.*, 1998, **120**, 5052. (d) M. E. Casida, *J. Chem. Phys.*, 1998, **108**, 4439. (e) R. E. Stratmann, G. E. Scuseria and M. J. Frisch, *J. Chem. Phys.*, 1998, **109**, 8218.
4. (a) C. Lee, W. Yang and R. G. Parr, *Phys. Rev. B*, 1988, **37**, 785. (b) A. D. Becke, *J. Chem. Phys.*, 1993, **98**, 5648.
5. J.-K. Yu, Y.-M. Cheng, Y.-H. Hu, P.-T. Chou, Y.-L. Chen, S.-W. Lee, Y. Chi, *J. Phys. Chem. B*, 2004, **108**, 19908.
